# Supplementary material for: DHX36 prevents the accumulation of translationally inactive mRNAs with G4-structures in untranslated regions
Source: PubMed Central journal article supplement (PMC6547686; doi:10.1038/s41467-019-10432-5), 2019-06-03
Supplement: 41467_2019_10432_MOESM10_ESM.pdf [file 41467_2019_10432_MOESM10_ESM.pdf]

## Reporting Summary

Nature Research wishes to improve the reproducibility of the work that we publish. This form provides structure for consistency and transparency in reporting. For further information on Nature Research policies, see [Authors & Referees](#) and the [Editorial Policy Checklist](#).

### Statistical parameters

When statistical analyses are reported, confirm that the following items are present in the relevant location (e.g. figure legend, table legend, main text, or Methods section).

n/a Confirmed

- The exact sample size ( $n$ ) for each experimental group/condition, given as a discrete number and unit of measurement
- An indication of whether measurements were taken from distinct samples or whether the same sample was measured repeatedly
- The statistical test(s) used AND whether they are one- or two-sided  
*Only common tests should be described solely by name; describe more complex techniques in the Methods section.*
- A description of all covariates tested
- A description of any assumptions or corrections, such as tests of normality and adjustment for multiple comparisons
- A full description of the statistics including central tendency (e.g. means) or other basic estimates (e.g. regression coefficient) AND variation (e.g. standard deviation) or associated estimates of uncertainty (e.g. confidence intervals)
- For null hypothesis testing, the test statistic (e.g.  $F$ ,  $t$ ,  $r$ ) with confidence intervals, effect sizes, degrees of freedom and  $P$  value noted  
*Give  $P$  values as exact values whenever suitable.*
- For Bayesian analysis, information on the choice of priors and Markov chain Monte Carlo settings
- For hierarchical and complex designs, identification of the appropriate level for tests and full reporting of outcomes
- Estimates of effect sizes (e.g. Cohen's  $d$ , Pearson's  $r$ ), indicating how they were calculated
- Clearly defined error bars  
*State explicitly what error bars represent (e.g. SD, SE, CI)*

*Our web collection on [statistics for biologists](#) may be useful.*

### Software and code

Policy information about [availability of computer code](#)

Data collection

Image Lab 5.2.1  
Fractionator Software v8.04  
Typhoon FLA 7000 Control Software  
Illumina HiSeq3000  
Spectra Manager Suite (Jasco)  
CFX Manager 2.0 (Biorad)  
StepOne software (Applied Biosystems)  
Leica TCS SP5  
BD FACSDIVA™ SOFTWARE

Data analysis

Image Lab 5.2.1  
Coral Draw X8  
Coral PhotoPaint X8  
Adobe Illustrator CS5  
Adobe Illustrator CS6  
Microsoft Excel 2016  
PARalyzer  
MEME suite  
IGV

R studio  
 CFX Manager 2.0 (Biorad)  
 Fiji  
 GraphPad Prism 6 FlowJo

For manuscripts utilizing custom algorithms or software that are central to the research but not yet described in published literature, software must be made available to editors/reviewers upon request. We strongly encourage code deposition in a community repository (e.g. GitHub). See the Nature Research [guidelines for submitting code & software](#) for further information.

## Data

Policy information about [availability of data](#)

All manuscripts must include a [data availability statement](#). This statement should provide the following information, where applicable:

- Accession codes, unique identifiers, or web links for publicly available datasets
- A list of figures that have associated raw data
- A description of any restrictions on data availability

PAR-CLIP, ribosome footprinting, and RNA-seq data have been deposited in the National Center for Biotechnology Information (NCBI) Sequence Read Archive under the accession number GSE105175.

## Field-specific reporting

Please select the best fit for your research. If you are not sure, read the appropriate sections before making your selection.

Life sciences  Behavioural & social sciences  Ecological, evolutionary & environmental sciences

For a reference copy of the document with all sections, see [nature.com/authors/policies/ReportingSummary-flat.pdf](https://www.nature.com/authors/policies/ReportingSummary-flat.pdf)

## Life sciences study design

All studies must disclose on these points even when the disclosure is negative.

Sample size

Data exclusions

Replication

Randomization

Blinding

## Reporting for specific materials, systems and methods

### Materials & experimental systems

n/a  Involved in the study

Unique biological materials

Antibodies

Eukaryotic cell lines

Palaeontology

Animals and other organisms

Human research participants

### Methods

n/a  Involved in the study

ChIP-seq

Flow cytometry

MRI-based neuroimaging

## Antibodies

Antibodies used

Primary antibodies  
 DHX36 antibody: Mouse DDX36 antibody (B-6), Santa Cruz Biotechnology, ref# sc-377485  
 TUBA4A antibody: Monoclonal Anti- $\alpha$ -Tubulin antibody produced in mouse, clone B-5-1-2, Sigma-Aldrich, now Merck, ref# T5168-1000UL  
 HA antibody: Anti-HA.11 Epitope Tag Antibody, mouse, Biolegend, previously Covance, ref# MMS-101R  
 CANX antibody: Anti-Calnexin antibody, mouse, clone AF18, Abcam, ref# ab31290

HISTH2B antibody: Anti-Histone H2B antibody -ChIP grade, rabbit, Abcam, ref# ab1790  
 FMR1 antibody: Linder, B. et al. Tdrd3 is a novel stress granule-associated protein interacting with the Fragile-X syndrome protein FMRP. Hum Mol Genet 17, 3236-46 (2008).  
 RPL22 antibody: Ribosomal Protein L22 (52), mouse, Santa Cruz Biotechnology, ref# sc-136413  
 FLAG antibody: Monoclonal ANTI-FLAG® M2 antibody produced in mouse, clone M2, Sigma-Aldrich, now Merck, ref# F1804-200UG  
 BG4: Biffi, G., Tannahill, D., McCafferty, J. & Balasubramanian, S. Quantitative visualization of DNA G-quadruplex structures in human cells. Nat Chem 5, 182-6 (2013).  
 Biffi, G., Di Antonio, M., Tannahill, D. & Balasubramanian, S. Visualization and selective chemical targeting of RNA G-quadruplex structures in the cytoplasm of human cells. Nat Chem 6, 75-80 (2014).  
 ATP1A1 antibody: Anti-alpha 1 Sodium Potassium ATPase antibody [464.6], Abcam, ref# ab7671  
 ACTB antibody: Anti-ACTB antibody produced in rabbit, Sigma Aldrich, now Merck, ref# AV40173-50UG  
 FLAG-Antibody for immunofluorescence experiments: DYKDDDDK Tag Antibody (Binds to same epitope as Sigma's Anti-FLAG® M2 Antibody), Cell signaling, ref# 2368

Secondary antibodies  
 goat anti-mouse IgG-HRP (Cruz Marker), Santa Cruz Biotechnology, sc-2031  
 goat anti-rabbit IgG-HRP Cruz Marker™compatible, Santa Cruz Biotechnology, sc-2030  
 Goat anti-Mouse IgG (H+L) Cross-Adsorbed Secondary Antibody, Alexa Fluor 488, Life technologies, ref# A11001  
 Goat anti-Rabbit IgG (H+L) Cross-Adsorbed Secondary Antibody, Cyanine3 Life technologies, ref# A10520

## Validation

DHX36 antibody: DDX36 (B-6) is recommended for detection of DDX36 of mouse, rat and human origin by Western Blotting [...].  
 TUBA4A antibody: Monoclonal Anti- $\alpha$ -Tubulin recognizes an epitope located in the C-terminal end of the  $\alpha$ -tubulin isoform in a variety of organisms (e.g., human, sea urchin, Chlamydomonas). [...]. The product is useful in immunoblotting, [...].  
 HA antibody: The HA tag (hemagglutinin) is an amino acid sequence derived from the human influenza hemagglutinin surface glycoprotein, corresponding to amino acids 98-106. It is commonly used as a tag to facilitate detection, isolation, and purification of proteins. The full amino acid sequence is: YPYDVPDYA  
 CANX antibody: Reacts with: Mouse, Human. This antibody gave a positive signal in the following, in WB - HeLa whole cell lysate, A431, HEK293; in IF - HeLa cells; in IHC - human liver carcinoma; in FC - HeLa.  
 HISTH2B antibody: Synthetic peptide conjugated to KLH derived from within residues 100 to the C-terminus of Human Histone H2B. Suitable for: WB, IHC-P, ChIP, ICC/IF, IP  
 FMR1 antibody: Linder, B. et al. Tdrd3 is a novel stress granule-associated protein interacting with the Fragile-X syndrome protein FMRP. Hum Mol Genet 17, 3236-46 (2008).  
 RPL22 antibody: Ribosomal Protein L22 (52) is recommended for detection of Ribosomal Protein L22 of mouse, rat, human and canine origin by Western Blotting [...].  
 FLAG antibody: The ANTI-FLAG M2 mouse, affinity purified monoclonal antibody binds to fusion proteins containing a FLAG peptide sequence. The antibody recognizes the FLAG peptide sequence at the N-terminus, Met-N-terminus, C-terminus, and internal sites of the fusion protein. For highly sensitive and specific detection of FLAG fusion proteins by immunoblotting, immunoprecipitation, immunohistochemistry, immunofluorescence and immunocytochemistry.  
 BG4: Biffi, G., Tannahill, D., McCafferty, J. & Balasubramanian, S. Quantitative visualization of DNA G-quadruplex structures in human cells. Nat Chem 5, 182-6 (2013).  
 Biffi, G., Di Antonio, M., Tannahill, D. & Balasubramanian, S. Visualization and selective chemical targeting of RNA G-quadruplex structures in the cytoplasm of human cells. Nat Chem 6, 75-80 (2014).  
 ATP1A1 antibody: Reacts with: This antibody is specific for Na,K-ATPase alpha 1 subunit. Mouse, Rat, Sheep, Rabbit, Dog, Human, Pig, Xenopus laevis, Monkey  
 ACTB antibody: Anti-ACTB (anti- $\beta$ -Actin) antibody recognizes an internal sequence of human  $\beta$ -actin.  
 FLAG-Antibody for immunofluorescence experiments: DYKDDDDK Tag Antibody detects exogenously expressed DYKDDDDK proteins in cells. The antibody recognizes the DYKDDDDK peptide (the same epitope recognized by Sigma's Anti-FLAG® antibodies) fused to either the amino- or carboxy-terminus of targeted proteins.

## Eukaryotic cell lines

Policy information about [cell lines](#)

|                                                                   |                                                                                                                                                           |
|-------------------------------------------------------------------|-----------------------------------------------------------------------------------------------------------------------------------------------------------|
| Cell line source(s)                                               | Flp-In™ T-REx™ 293 Cell Line, Thermo Fisher Scientific, ref# R78007. All other cell lines used in this study are generated out of this paternal cell line |
| Authentication                                                    | Generated cell lines in this study were verified by Western blot, fluorescence activated cell sorting, and/or sequencing of genomic DNA                   |
| Mycoplasma contamination                                          | All used cell lines are free of mycoplasma contamination                                                                                                  |
| Commonly misidentified lines (See <a href="#">ICLAC</a> register) | <i>Name any commonly misidentified cell lines used in the study and provide a rationale for their use.</i>                                                |

## Flow Cytometry

### Plots

Confirm that:

- The axis labels state the marker and fluorochrome used (e.g. CD4-FITC).
- The axis scales are clearly visible. Include numbers along axes only for bottom left plot of group (a 'group' is an analysis of identical markers).
- All plots are contour plots with outliers or pseudocolor plots.
- A numerical value for number of cells or percentage (with statistics) is provided.

### Methodology

Sample preparation

For mCherry expression, cell lines with stably integrated pcDNA5-FRT-GFP-mCherry-3pGW reporter constructs were induced with 500 ng ml<sup>-1</sup> tetracycline (Merck) for 15 h. Cells were trypsinized, washed twice with PBS, and filtered through a 35 µm nylon net.

Instrument

LSRFortessa™ BD Biosciences

Software

BD FACSDIVA™ SOFTWARE and FlowJo

Cell population abundance

Over 90%

Gating strategy

FSC/SCC was gated to exclude cell duplets and to ensure a homogenous cell population

- Tick this box to confirm that a figure exemplifying the gating strategy is provided in the Supplementary Information.
